# Supplementary material for: Inhibition of Phosphodiesterase 5 Promotes the Aromatase-Mediated Estrogen Biosynthesis in Osteoblastic Cells by Activation of cGMP/PKG/SHP2 Pathway
Source: PubMed Central journal article supplement (PMC7995890; doi:10.3389/fendo.2021.636784), 2021-03-12
Supplement: Image_1.pdf [file Image_1.pdf]

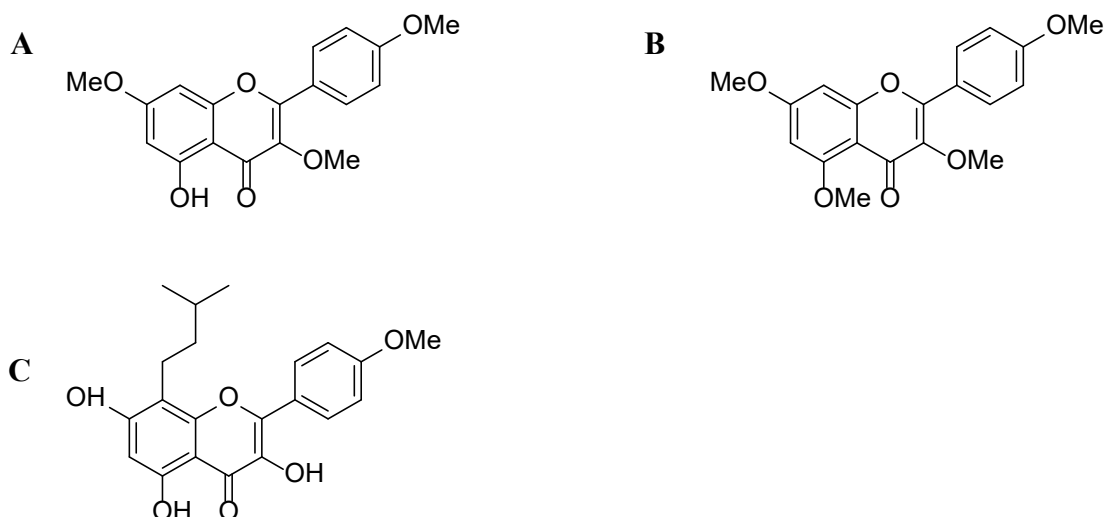

**Figure S1. (A) Compound 3:**  $^1\text{H}$  NMR (400 MHz,  $\text{DMSO-}d_6$ ):  $\delta$  12.63 (s, 1H), 8.06 (d,  $J = 9.0$  Hz, 2H), 7.15 (d,  $J = 9.0$  Hz, 2H), 6.77 (d,  $J = 2.1$  Hz, 1H), 6.39 (d,  $J = 2.1$  Hz, 1H), 3.86 (s, 6H), 3.81 (s, 3H).  $^{13}\text{C}$  NMR (100 MHz,  $\text{DMSO-}d_6$ ):  $\delta$  178.15, 165.22, 161.48, 160.96, 156.39, 155.58, 138.19, 130.09 (C-2'/6'), 122.11, 114.30 (C-3'/5'), 105.29, 97.86, 92.45, 59.81, 56.13, 55.50. ESI-HRMS  $m/z$ : 351.0826  $[\text{M}+\text{Na}]^+$  (calcd for  $\text{C}_{18}\text{H}_{16}\text{O}_6\text{Na}$ : 351.0839). **(B) Compound 4:**  $^1\text{H}$  NMR (400 MHz,  $\text{DMSO-}d_6$ ):  $\delta$  8.03 (d,  $J = 9.0$  Hz, 2H), 7.12 (d,  $J = 9.0$  Hz, 2H), 6.80 (d,  $J = 2.2$  Hz, 1H), 6.49 (d,  $J = 2.2$  Hz, 1H), 3.89 (s, 3H), 3.85 (s, 3H), 3.84 (s, 3H), 3.73 (s, 3H).  $^{13}\text{C}$  NMR (150 MHz,  $\text{DMSO-}d_6$ ):  $\delta$  172.03, 163.68, 160.88, 160.33, 158.18, 151.73, 140.23, 129.55 (C-2'/6'), 122.51, 114.14 (C-3'/5'), 108.50, 95.90, 92.98, 59.26, 56.11, 55.98, 55.39. ESI-HRMS  $m/z$ : 343.1180  $[\text{M}+\text{H}]^+$  (calcd for  $\text{C}_{19}\text{H}_{19}\text{O}_6$ : 343.1176). **(C) Compound 15:**  $^1\text{H}$  NMR (400 MHz,  $\text{CDCl}_3$ ):  $\delta$  11.74 (s, 1H), 8.20 (d,  $J = 9.0$  Hz, 2H), 7.05 (d,  $J = 9.0$  Hz, 2H), 6.59 (s, 1H), 6.29 (s, 1H), 5.47 (s, 1H), 3.91 (s, 3H), 2.84 (t,  $J = 8.0$  Hz, 2H), 1.73 – 1.68 (m, 1H), 1.53 – 1.48 (m, 2H), 1.02 (s, 3H), 1.01 (s, 3H). ESI-HRMS  $m/z$ : 393.1307  $[\text{M}+\text{Na}]^+$  (calcd for  $\text{C}_{21}\text{H}_{22}\text{O}_6\text{Na}$ : 393.1309).

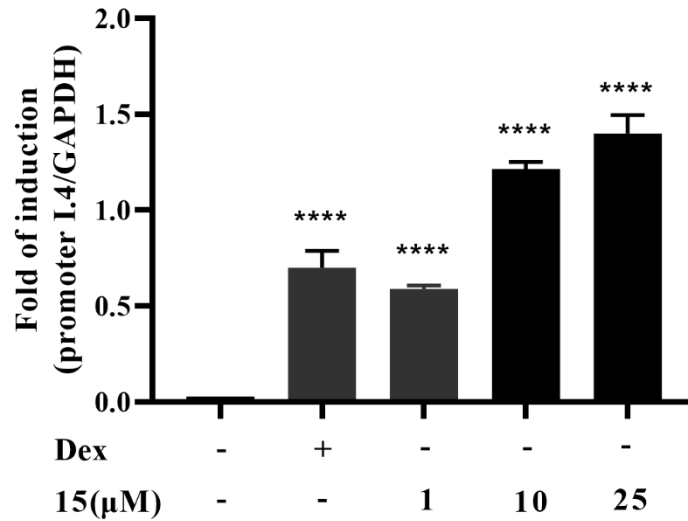

**Figure S2. The mRNA expression of aromatase promoter I.4 in UMR106 cells.** UMR 106 cells were incubated with the indicated concentrations of 15 and Dex (100 nM) for 24 h. Aromatase promoter I.4 mRNA was measured in total cellular RNA by real-time qPCR. The results are expressed as fold increase relative to levels in untreated cells. GAPDH was used as an internal control. (\*\*\*\*)  $p < 0.0001$  compared to the DMSO control

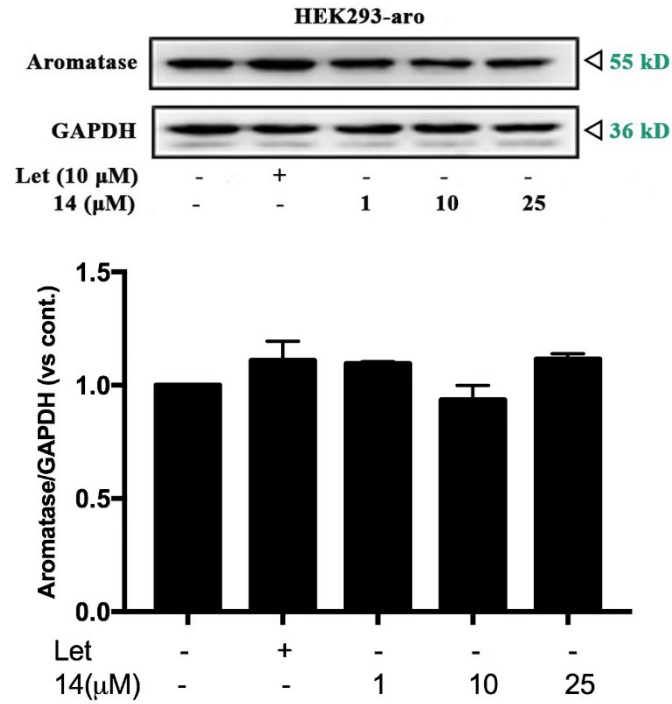

**Figure S3.** 14 had no effect on aromatase protein expression in aromatase-overexpressing HEK293A cells. Aromatase-overexpressing HEK293A cells were treated by Let (10  $\mu$ M) and 14 at the indicated concentrations in 24-well plates for 24 h, and then supplemented with testosterone (10 nM) for a further 24 h. The cell lysates were immunoblotted with anti-aromatase and anti-GAPDH antibodies. The quantitative results are depicted.

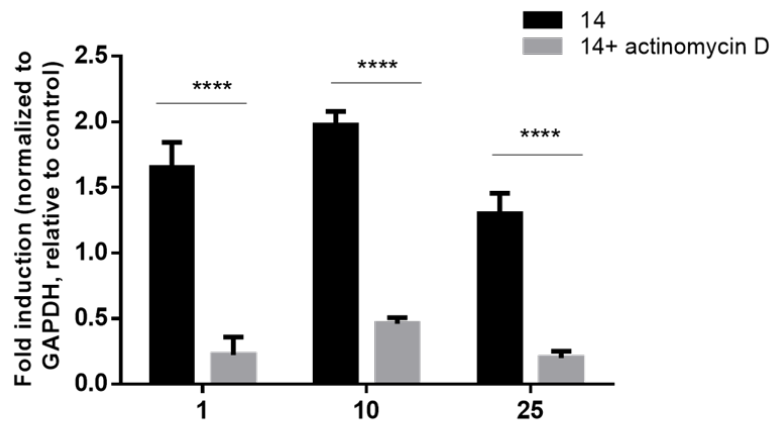

**Figure S4.** Effect of actinomycin D on 14-induced aromatase transcription. UMR 106 cells were incubated with the indicated concentration of 14 (1, 10, 25  $\mu$ M) and 14 (1, 10, 25  $\mu$ M) in combination actinomycin D (100 nM) for 24 h. The level of aromatase mRNA in total cellular RNA was measured by real-time qPCR. The results are expressed as fold increase relative to levels in untreated cells. GAPDH was used as an internal control.

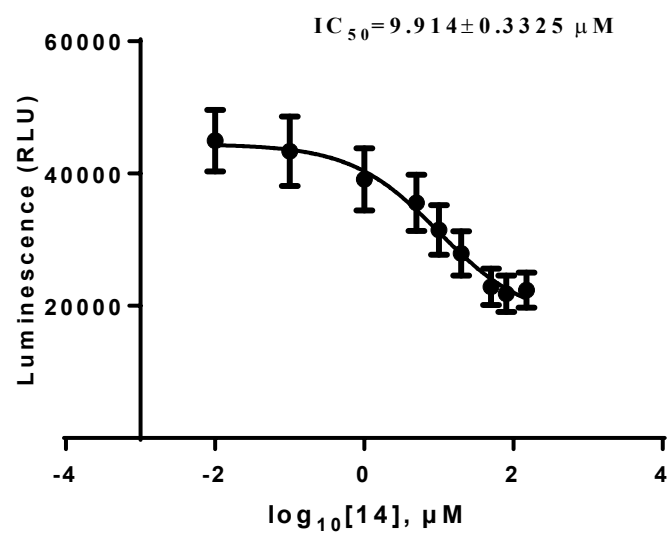

**Figure S5.** Effect of **14** on the inhibition of PDE5A activity. The concentration-response curve of **14** for the inhibition of recombinant expressed PDE5 protein was examined by PDE-glo™ phosphodiesterase assay.

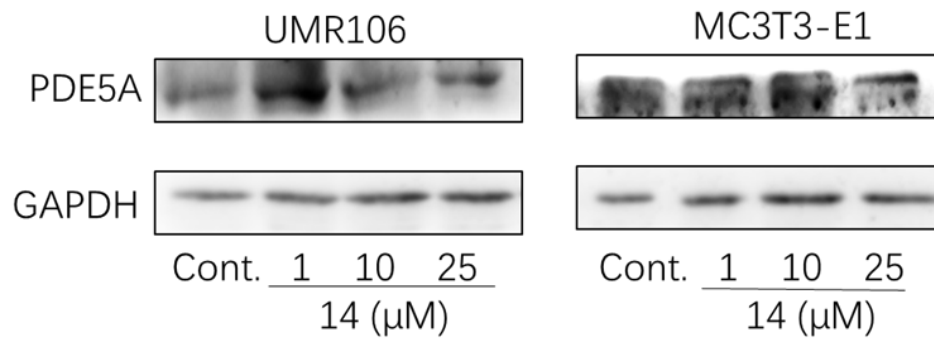

**Figure S6. Effect of 14 on PDE5 expression.** UMR106 and MC3T3-E1 cells were treated with the indicated concentrations of 14 for 24 h. The cell lysates were immunoblotted with PDE5A and GAPDH antibodies.

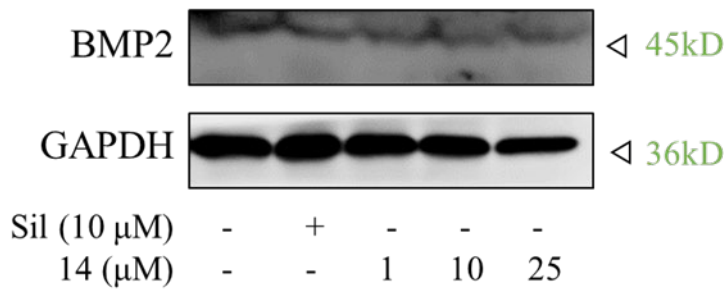

**Figure S7. Effect of 14 on BMP2 expression.** UMR106 cells were treated with the indicated concentrations of 14 for 24 h. The cell lysates were immunoblotted with BMP2 and GAPDH antibodies.

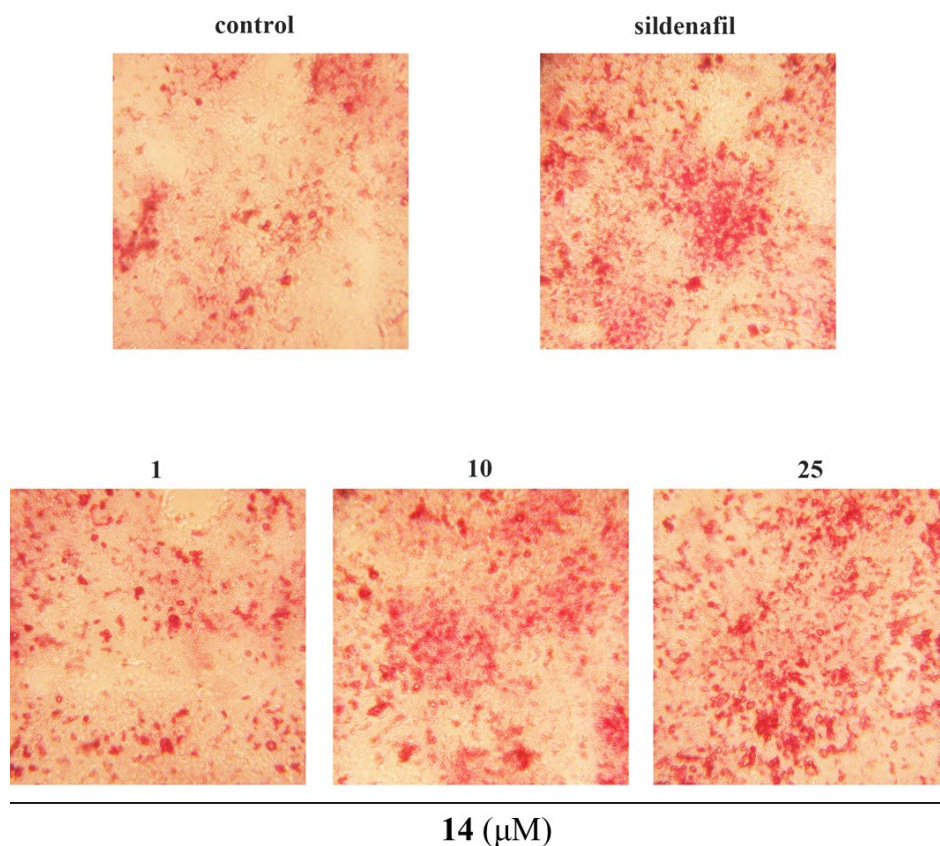

**Figure S8. Compound 14 promoted the osteoblastic cell differentiation.** UMR106 cells were seeded in 24-well plates and cultured overnight. Cells were treated with sildenafil (10  $\mu\text{M}$ ) and 14 (1, 10, or 25  $\mu\text{M}$ ) for 48 h, then replace the culture medium with differentiation medium (DMEM supplemented with 10 % FBS, 1 % penicillin/streptomycin, 50  $\mu\text{g}/\text{mL}$  of ascorbic acid, 10 mM  $\beta$ -glycerophosphate, and 10 nM dexamethasone). The medium was refreshed every 3 days. On day 10, the cells were fixed with 4 % paraformaldehyde for 20 min, and then stained with 2 % Alizarin Red S for 10 min. Orange red parts represent the cell differentiation. Control, DMSO.



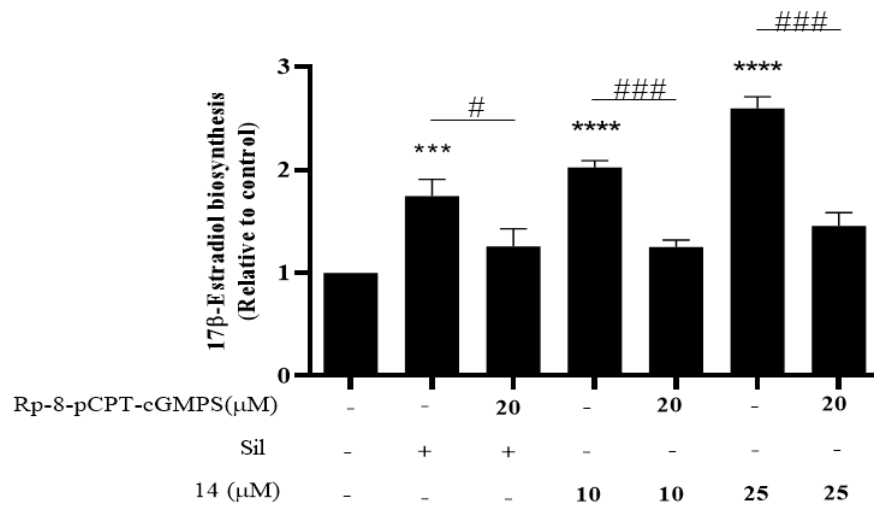

**Figure S9. Effect of PKG inhibition on 14-induced estrogen biosynthesis.** UMR106 cells were seeded in 24-well plates overnight. The medium was replaced to serum-free medium, and cells were treated with 14 and Rp-8-pCPT-cGMPS for 2 h. Testosterone was added to each wells, and cells were cultured for a further 48 h. 17β-estradiol concentration was quantified with an ELISA (E<sub>2</sub>) detection kit. Sil, 10 μM sildenafil. (\*\*\*) p <0.001 and (\*\*\*\*) p <0.0001 compared to the DMSO control; (#) p <0.05, (###) p <0.001 compared to Rp-pCPT-cGMPS-treated cells.
